# Supplementary material
Source: Springer Nature journal article supplement (https://www.springermedizin.de/resource/supplementary/12879_2012_1934_MOESM1_ESM.pdf/9443316)

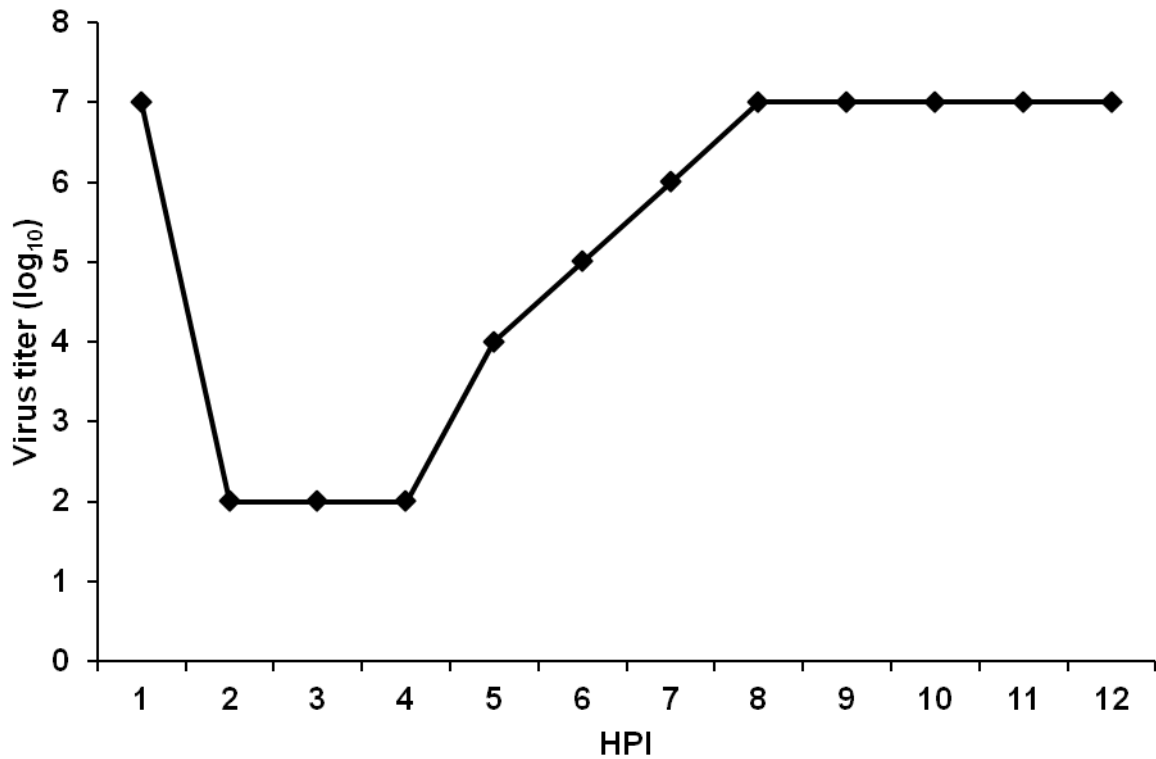

Supplement: MOESM1 [file 9443316]
